# Supplementary material for: Application of the Chinese Version of the Montreal Cognitive Assessment-Basic for Assessing Mild Cognitive Impairment in Parkinson’s Disease
Source: MDPI journal article supplement (doi:10.3390/brainsci11121575), 2021-11-28
Supplement: s1 [file s1]

**Table S1.** Drug usage of enrolled patients with PD

| <b>Items</b>                     | <b>Total PD</b>  | <b>PD-NC</b>   | <b>PD-MCI</b>  | <b><i>P value</i></b> |
|----------------------------------|------------------|----------------|----------------|-----------------------|
| Without medication, <i>n</i> (%) | 74(35.7%)        | 47(34.3%)      | 27(38.6%)      | 0.297                 |
| Levodopa, <i>n</i> (%)           | 123(59.4%)       | 82(59.9%)      | 41(58.6%)      | 0.859                 |
| Dopamine agonist, <i>n</i> (%)   | 81(39.1%)        | 55(40.1%)      | 26(37.1%)      | 0.675                 |
| MAO-BI, <i>n</i> (%)             | 18(8.7%)         | 15(10.9%)      | 3(4.3%)        | 0.107                 |
| COMTI, <i>n</i> (%)              | 8(3.9%)          | 5(3.6%)        | 3(4.3%)        | 1.000                 |
| Amantadine, <i>n</i> (%)         | 10(4.8%)         | 5(3.6%)        | 5(7.1%)        | 0.444                 |
| Artane, <i>n</i> (%)             | 3(1.4%)          | 1(0.1%)        | 2(2.9%)        | 0.551                 |
| LEDD (mg/d)                      | 225.0(0.0,400.0) | 225.0(0,375.0) | 168.8(0,400.0) | 0.836                 |

Abbreviations: PD, Parkinson's disease; PD-NC, Parkinson's disease with normal cognition; PD-MCI, Parkinson's disease with mild cognitive impairment; MAO-BI, monoamine oxidase-B inhibitor; COMTI, Catechol O-methyltransferase inhibitor; LEDD, Levodopa equipment daily dose.
